# Supplementary material for: Genome Mining and Metabolic Profiling Reveal Cytotoxic Cyclodipeptides in Streptomyces hygrospinosus var. Beijingensis
Source: MDPI journal article supplement (doi:10.3390/antibiotics11111463), 2022-10-24
Supplement: s1 [file s1]

## Supplementary Materials

### Genome mining and metabolic profiling reveal cytotoxic cyclodipeptides in *Streptomyces hygrospinosus* var. *beijingensis*

Dashan Zhang<sup>†</sup>, Junbo Wang<sup>†</sup>, Yongjian Qiao<sup>†</sup>, Baixin Lin<sup>†</sup>, Zixin Deng<sup>†</sup>, Lingxin Kong<sup>†\*</sup>, Delin You<sup>†\*</sup>

<sup>†</sup> State Key Laboratory of Microbial Metabolism, Joint International Research Laboratory of Metabolic and Developmental Sciences, School of Life Sciences and Biotechnology, Shanghai Jiao Tong University, Shanghai 200240, China;

\*Corresponding author E-mail: konglingxin7@sjtu.edu.cn; dlyou@sjtu.edu.cn.

#### Table of Contents

| Contents                                                                                                                               | pages |
|----------------------------------------------------------------------------------------------------------------------------------------|-------|
| <b>Table S1.</b> Strains and plasmids used in this study                                                                               | 2     |
| <b>Table S2.</b> Primers used in this study                                                                                            | 2     |
| <b>Table S3.</b> Cytotoxicity assay of compounds <b>1-5</b>                                                                            | 2     |
| <b>Table S4.</b> Antibacteria activity assay of compounds <b>1</b> and <b>2</b> .                                                      | 3     |
| <b>Table S5.</b> Ten mediums in this study.                                                                                            | 3     |
| <b>Figure S1.</b> HPLC analysis of fermentation products of <i>S. hygrospinosus</i> 26D9-414 from eleven different mediums.            | 4     |
| <b>Figure S2.</b> Biosynthetic analysis of CDPs.                                                                                       | 5     |
| <b>Figure S3.</b> Schematic construction and PCR verification of <i>S. hygrospinosus</i> $\Delta cdp$ mutant.                          | 6     |
| <b>Figure S4.</b> HPLC analysis of metabolites in <i>S. hygrospinosus</i> 26D9-414 and in <i>S. hygrospinosus</i> $\Delta cdp$ mutant. | 7     |
| <b>Figure S5.</b> Distribution statistics of putative <i>cdp</i> gene analogues.                                                       | 8     |
| <b>Figure S6-12.</b> 1D and 2D NMR, HR-ESI-MS, and UV spectra of compound <b>1</b>                                                     | 9-12  |
| <b>Figure S13-20.</b> 1D and 2D NMR, HR-ESI-MS, and UV spectra of compound <b>2</b>                                                    | 13-16 |

**Table S1.** Strains and plasmids used in this study

| Strain or plasmid                    | Description                                             | Source or reference |
|--------------------------------------|---------------------------------------------------------|---------------------|
| <b>Streptomyces strains</b>          |                                                         |                     |
| <i>S. hygrospinosus</i> 26D9-414     | <i>ani</i> and <i>tetr</i> deletion mutant              | [18]                |
| <i>S. hygrospinosus</i> $\Delta cdp$ | <i>Ani</i> , <i>tetr</i> and <i>cdp</i> deletion mutant | This study          |
| <b>E. coli strains</b>               |                                                         |                     |
| DH10B                                | General molecule cloning strain                         | Gibco BRL           |
| ET12567/pUZ8002                      | Intergeneric conjugation strain                         | [38]                |
| <b>Plasmids</b>                      |                                                         |                     |
| pJTU1278                             | template plasmid for gene deletion                      | [39]                |
| pIJ773                               | template for PCR amplification of <i>Apr</i> gene       | [40]                |
| pZDS-1                               | constructed plasmid for the <i>cdp</i> genes deletion   | This study          |

**Table S2.** Primers used in this study

| Primer     | Sequence (5'–3')                                 | Use(s)                                                                                |
|------------|--------------------------------------------------|---------------------------------------------------------------------------------------|
| cdp-L-P1   | GGCCGCTCTAGAACTAGTGGATCCTGATGTTGGCGGCGAAGATGAC   | Amplification of <i>cdp</i> fragment for insertion into pJTU1278 by one-step cloning. |
| cdp-L-P2   | GAAGCAGCTCCAGCCTACACGATTGACCTGCGGCTGGATTC        |                                                                                       |
| cdp-apr-P1 | GAATCCAGCCGCGAGGTCAATCGTGTAGGCTGGAGCTGCTTC       | Amplification of <i>Apr</i> cassette from pIJ773                                      |
| cdp-apr-P2 | TGTTGTGGCACCGCGACAAATTCGCGGGATCCGTCGACC          |                                                                                       |
| cdp-R-P1   | GGTCGACGGATCCCCGGAATTTGTCGCGGTGCCACAACA          | Amplification of <i>cdp</i> fragment for insertion into pJTU1278 by one-step cloning. |
| cdp-R-P2   | GTATCGATAAGCTTGATATCGAATTCAGCAGAAGATGAGCCCGAGTTC |                                                                                       |
| apr-P1     | CAGCGTCGTGTTGGCATCGT                             | Verification of $\Delta cdp$ mutant strain                                            |
| apr-P2     | ATCAGCGGTGGAGTGCAATGTC                           |                                                                                       |
| cdp1-P1    | GGTCCGAGATCGTCAAGAGCAT                           | Verification of $\Delta cdp$ mutant strain                                            |
| cdp1-P2    | GCAGCAGCATGGTGAGGTTCT                            |                                                                                       |

**Table S3.** Cytotoxicity assay of compounds 1-5 (IC<sub>50</sub>,  $\mu$ M)

| Compound         | A549 | HL60 | SMMC-7721 | SW480                              | MDA-MB-231                         |
|------------------|------|------|-----------|------------------------------------|------------------------------------|
| <b>1</b>         | >40  | >40  | >40       | >40                                | >40                                |
| <b>2</b>         | >40  | >40  | >40       | <b>13.42 <math>\pm</math> 0.78</b> | <b>18.26 <math>\pm</math> 1.56</b> |
| <b>3</b>         | >40  | >40  | >40       | >40                                | >40                                |
| <b>4</b>         | >40  | >40  | >40       | >40                                | >40                                |
| <b>5</b>         | >40  | >40  | >40       | >40                                | >40                                |
| <b>cisplatin</b> | -    | -    | -         | 14.99 $\pm$ 0.09                   | 14.03 $\pm$ 0.75                   |

<sup>a</sup>Human lung carcinoma (A549), human leukemia cell (HL60), human hepatocellular carcinoma (SMMC-7721), human colon cancer cell (SW480) and human breast carcinoma

(MDA-MB-231 were tested for cytotoxicity of CDPs and cisplatin was used as positive control.

**Table S4.** Antibacterial activity assay of compounds **1-9**.

| Compound  | <i>E. coli</i> | <i>P. aeruginosa</i> | <i>S. aureus</i> | <i>B. subtilis</i> | <i>X.albilineans</i> | <i>C. albicans</i> | <i>C. sake</i> |
|-----------|----------------|----------------------|------------------|--------------------|----------------------|--------------------|----------------|
| <b>1</b>  | >1.0           | >1.0                 | >1.0             | >1.0               | >1.0                 | >1.0               | >1.0           |
| <b>2</b>  | >1.0           | >1.0                 | >1.0             | >1.0               | <b>0.25</b>          | <b>1.0</b>         | <b>1.0</b>     |
| <b>3</b>  | >1.0           | >1.0                 | >1.0             | >1.0               | >1.0                 | >1.0               | >1.0           |
| <b>4</b>  | >1.0           | >1.0                 | >1.0             | >1.0               | >1.0                 | >1.0               | >1.0           |
| <b>5</b>  | >1.0           | >1.0                 | >1.0             | >1.0               | >1.0                 | >1.0               | >1.0           |
| <b>6</b>  | >1.0           | >1.0                 | >1.0             | >1.0               | >1.0                 | >1.0               | >1.0           |
| <b>7</b>  | >1.0           | >1.0                 | >1.0             | >1.0               | >1.0                 | >1.0               | >1.0           |
| <b>8</b>  | >1.0           | >1.0                 | >1.0             | >1.0               | >1.0                 | >1.0               | >1.0           |
| <b>9</b>  | >1.0           | >1.0                 | >1.0             | >1.0               | >1.0                 | >1.0               | >1.0           |
| apramycin | 0.025          | 0.025                | 0.013            | 0.006              | 0.006                | -                  | -              |
| nystatin  | -              | -                    | -                | -                  | -                    | 0.004              | 0.002          |

Apramycin and nystatin as positive control.

**Table S5.** Ten selected mediums in this study.

| Name  | Composition                                                                                                                                                                                                                                                                                                                                                                                                  |
|-------|--------------------------------------------------------------------------------------------------------------------------------------------------------------------------------------------------------------------------------------------------------------------------------------------------------------------------------------------------------------------------------------------------------------|
| PYJ1  | Glucose 40 g, glycerol 10 g, soluble starch 30 g, soytone 15 g, beef extract 10 g, peptone 6.5 g, yeast extract 0.5 g, MgSO <sub>4</sub> 1 g, NaCl 2g, CaCO <sub>3</sub> 2,4 g in 1.0 L of distilled H <sub>2</sub> O. [41]                                                                                                                                                                                  |
| PYJ2  | Sucrose 100 g, glucose 10 g, casamino acids 0.1 g, yeast extract 5 g, MOPS 21 g, K <sub>2</sub> SO <sub>4</sub> 0.25 g, MgCl <sub>2</sub> ·6H <sub>2</sub> O 10 g, FeSO <sub>4</sub> ·7H <sub>2</sub> O 0.001 g, MnCl <sub>2</sub> ·7H <sub>2</sub> O 0.001 g, ZnSO <sub>4</sub> ·7H <sub>2</sub> O 0.001 g in 1.0 L of distilled H <sub>2</sub> O, pH 7.0. [42]                                             |
| PYJ3  | Soluble starch 15g, soy peptone 15 g, soybean meal 5 g, glycerol 15 g, CaCO <sub>3</sub> 2 g, sea salt 30 g in 1.0 L of distilled H <sub>2</sub> O. [43]                                                                                                                                                                                                                                                     |
| PYJ4  | Glycerol 10 g, peptone 8.6 g, soybean meal 40 g, cottonseed meal 20 g, mannitol 97.3 g, ornithine 5.3 g, proline 5 g, CaCl <sub>2</sub> 5 g, K <sub>2</sub> HPO <sub>4</sub> 8.4 g, MgSO <sub>4</sub> ·7H <sub>2</sub> O 5g, CuSO <sub>4</sub> ·5H <sub>2</sub> O 0.6 g, MnSO <sub>4</sub> ·H <sub>2</sub> O 0.1 g, FeSO <sub>4</sub> ·7H <sub>2</sub> O 0.05 g in 1.0 L of distilled H <sub>2</sub> O. [44] |
| PYJ5  | Corn starch 24 g, glucose 10 g, peptone 3 g, beef extract 3 g, yeast extract 5 g, CaCO <sub>3</sub> 4 g in 1.0 L of distilled H <sub>2</sub> O, pH 7.0. [45]                                                                                                                                                                                                                                                 |
| PYJ6  | glucose 10 g, Dextrin 25 g, oat meal 20 g, cottonseed meal 10 g, fish meal 5 g, yeast extract 2 g, CaCO <sub>3</sub> 3 g in 1.0 L of distilled H <sub>2</sub> O, pH 7.2. [46]                                                                                                                                                                                                                                |
| PYJ7  | Soluble starch 30g, glucose 15 g, glycerol 5 g, NaNO <sub>3</sub> 5 g, NH <sub>4</sub> Cl 5 g, K <sub>2</sub> HPO <sub>4</sub> 1 g, KH <sub>2</sub> PO <sub>4</sub> 2 g, MnSO <sub>4</sub> ·7H <sub>2</sub> O 2 g, CaCO <sub>3</sub> 2 g in 1.0 L of distilled H <sub>2</sub> O. (This research)                                                                                                             |
| PYJ8  | Dextrin 40 g, molasses 5 g, glucose 10 g, casamino acid 10 g, MgSO <sub>4</sub> ·7H <sub>2</sub> O 1 g, CaCO <sub>3</sub> 2 g in 1.0 L of distilled H <sub>2</sub> O, pH 7.5. (This research)                                                                                                                                                                                                                |
| PYJ9  | Soluble starch 10 g, peptone 10 g, glycerol 10 g, mannitol 5 g, (NH <sub>4</sub> ) <sub>2</sub> HPO <sub>4</sub> 1 g in 1.0 L of distilled H <sub>2</sub> O, pH 7.0. (This research)                                                                                                                                                                                                                         |
| PYJ10 | glucose 25 g, soya flour 18.8 g, molasses 3.75 g, NZ Amine type A 1.25 g, CH <sub>3</sub> COONa 8 g, CaCO <sub>3</sub> 3 g in 1.0 L of distilled H <sub>2</sub> O, pH 7.0. (This research)                                                                                                                                                                                                                   |

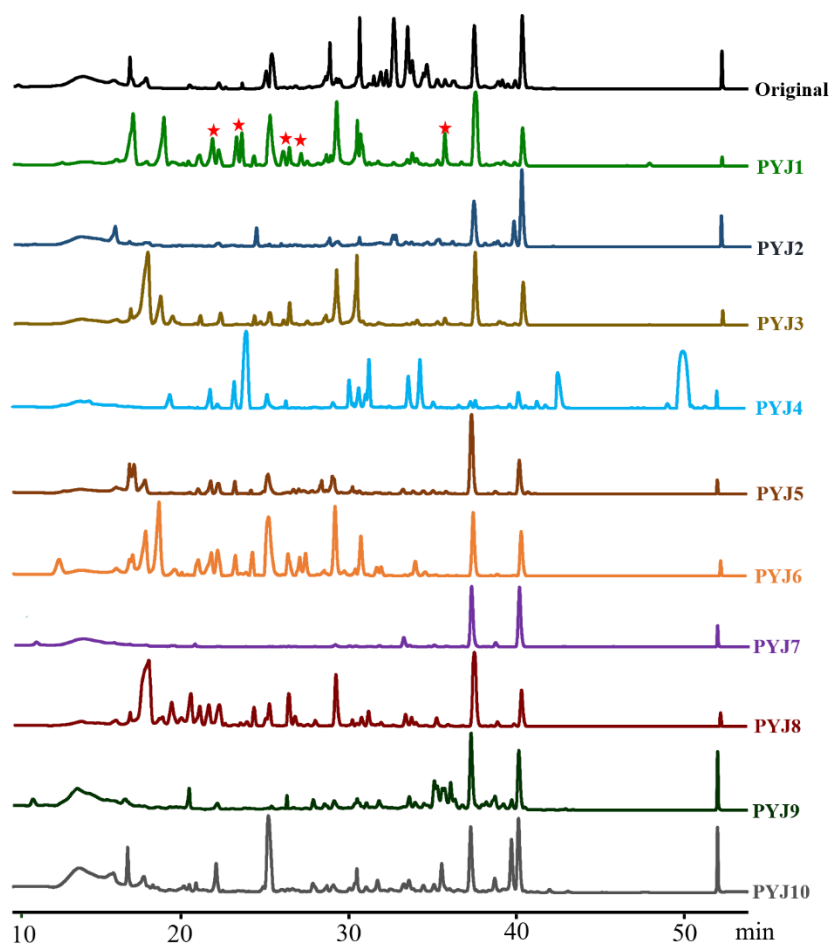

**Figure S1.** HPLC analysis of fermentation products of *S. hygrospinosus* 26D9-414 from eleven different media.

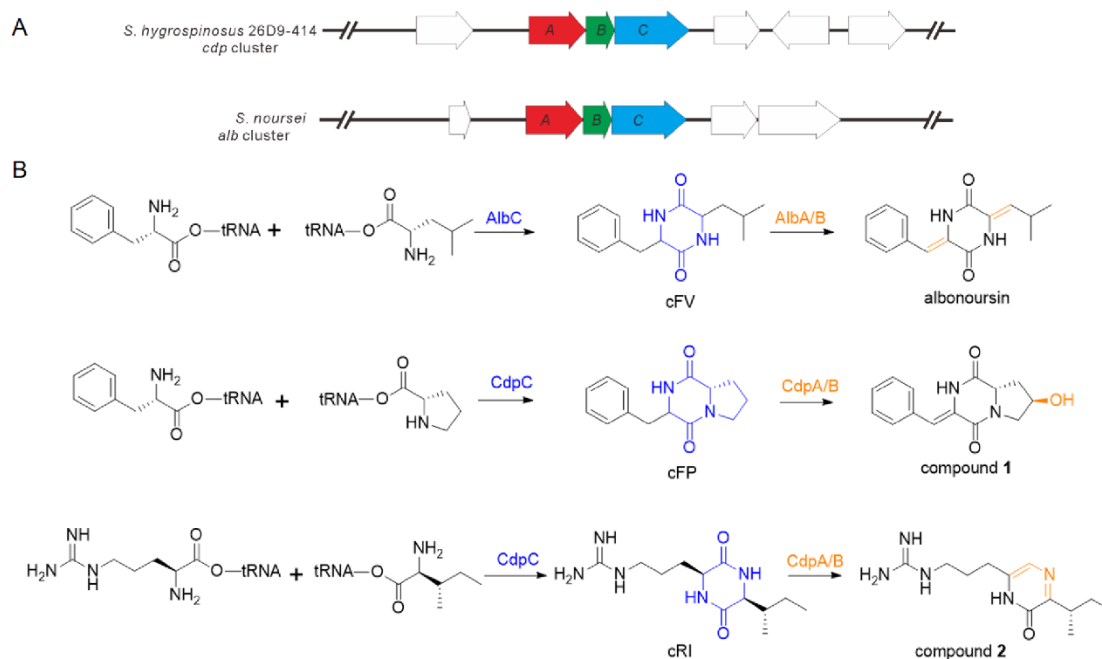

**Figure S2.** Biosynthetic analysis of CDPs. (A) Comparative analysis of *cdp* cluster with the reported *alb* cluster. Proteins encoded by *alb* cluster for albonoursin biosynthesis: AlbA, cyclic dipeptide synthase (CDPS), AlbB and AlbC, cyclic dipeptide oxidase (CDO) [21]. (B) biosynthetic machineries for CDPs (compounds **1** and **2**) in this study.

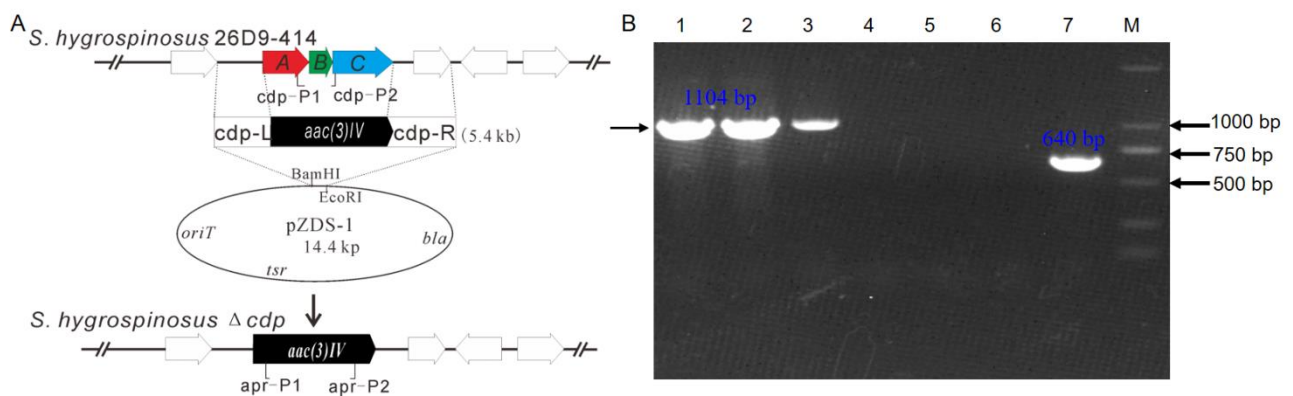

**Figure S3.** Schematic construction and verification of *S. hygrospinosus*  $\Delta cdp$  mutant. **(A)** Schematic representation of *cdpA-C* fragment replaced by *aac(3)IV* apramycin resistance gene, and then the mutated shuttle plasmid pZDS-1 was introduced into *S. hygrospinosus* 26D9-414 by intergeneric conjugation. **(B)** PCR verification of *S. hygrospinosus*  $\Delta cdp$  mutants using primers apr-L/R and cdp-L/R. Lane 1 and 2, genome of two clone of *S. hygrospinosus*  $\Delta cdp$  mutant were used as template using primers apr-L/R; lane 3, pIJ773 was used as template for positive control; lane 4, genome of *S. hygrospinosus* 26D9-414 used as template for negative control; lane 5 and 6, genome of two clone of *S. hygrospinosus*  $\Delta cdp$  mutant were used as template using primers cdp-L/R; lane 7, genome of *S. hygrospinosus* 26D9-414 used as template for negative control; M, LD DS<sup>TM</sup> 2000 kb DNA ladder.

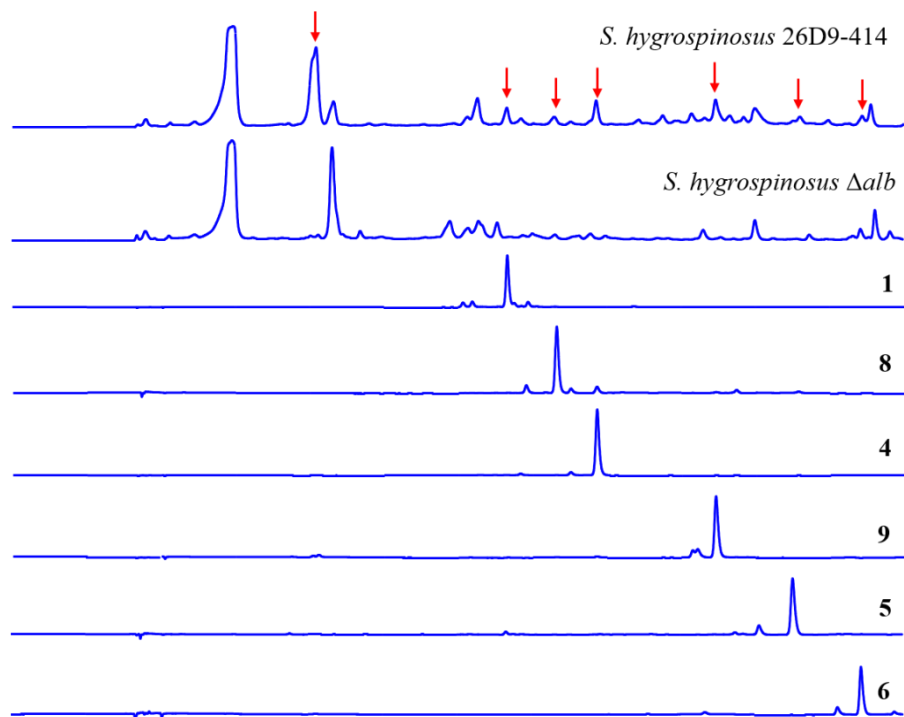

**Figure S4.** HPLC analysis of metabolites in *S. hygrospinosus* 26D9-414 and in *S. hygrospinosus*  $\Delta cdp$  mutant.

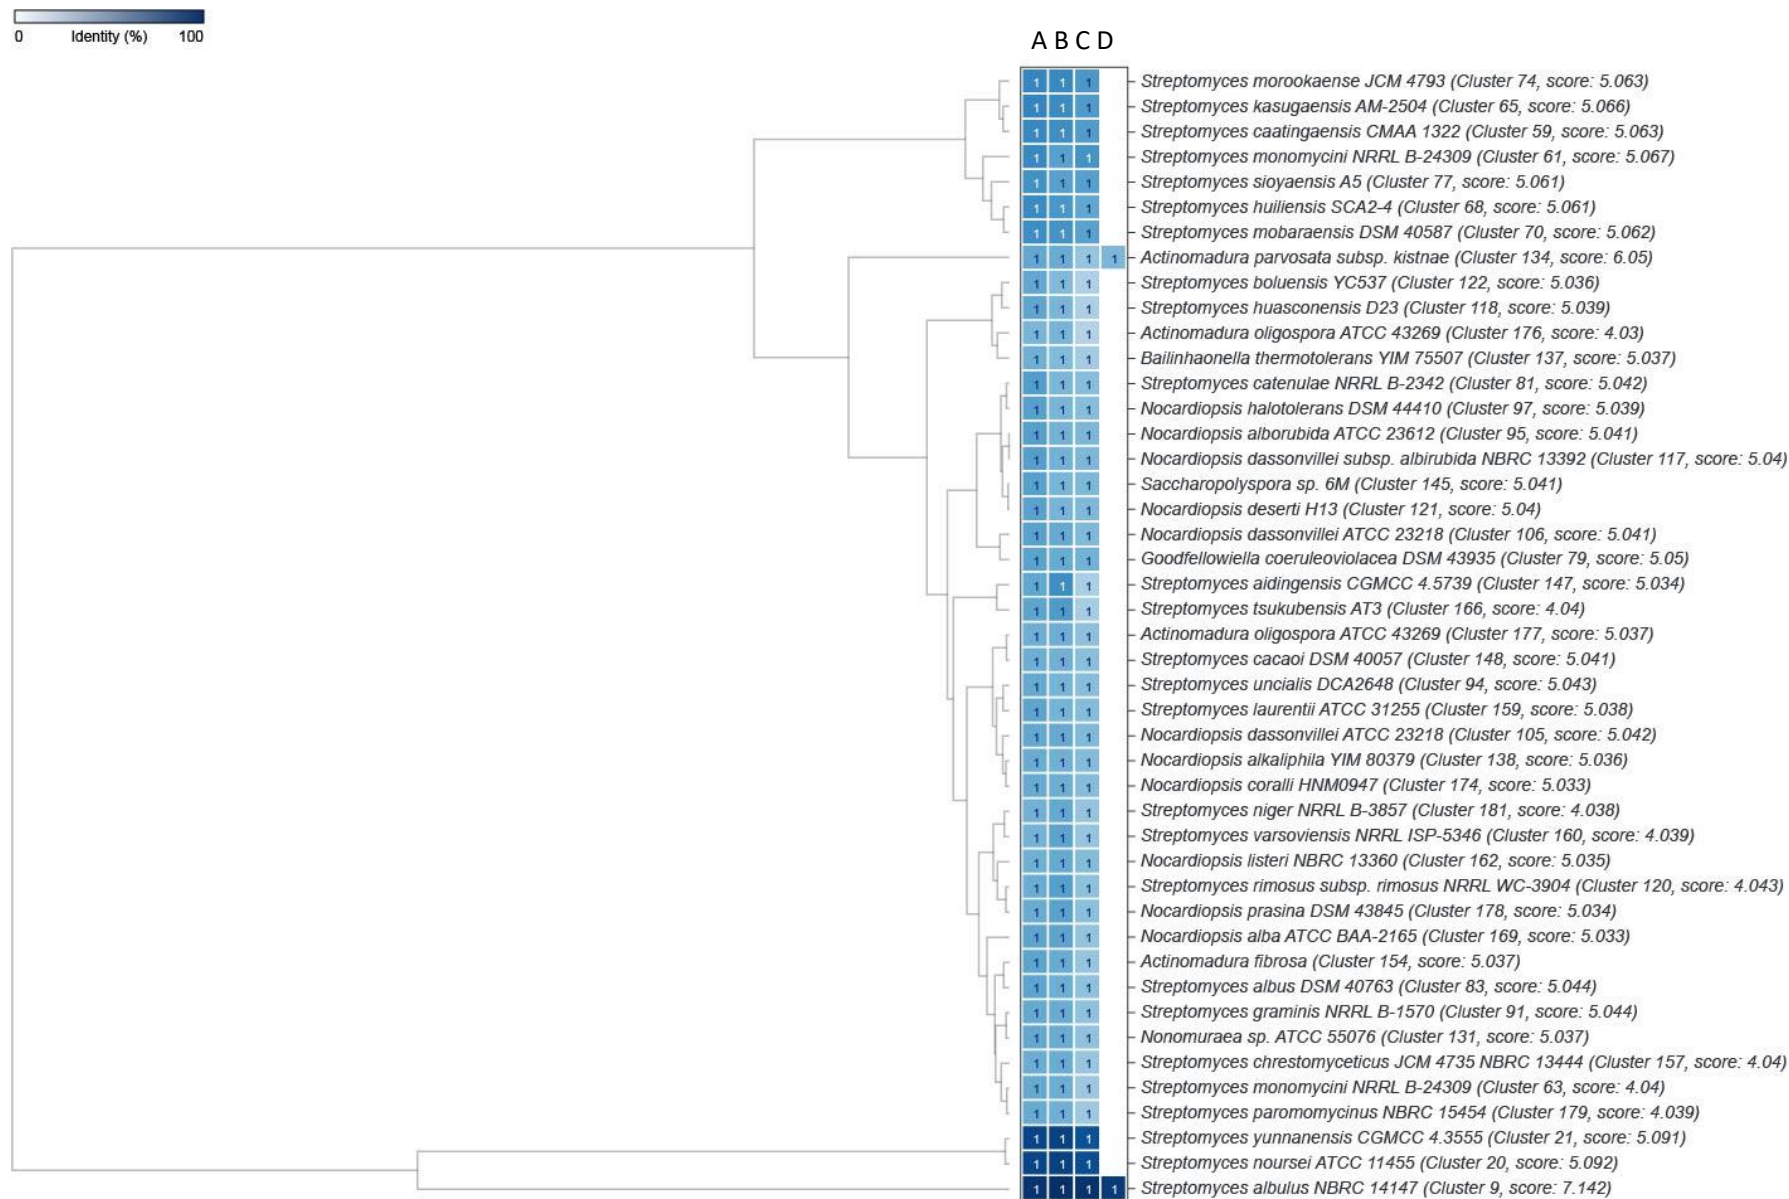

**Figures S5.** Distribution statistics of putative *cdp* gene analogues.



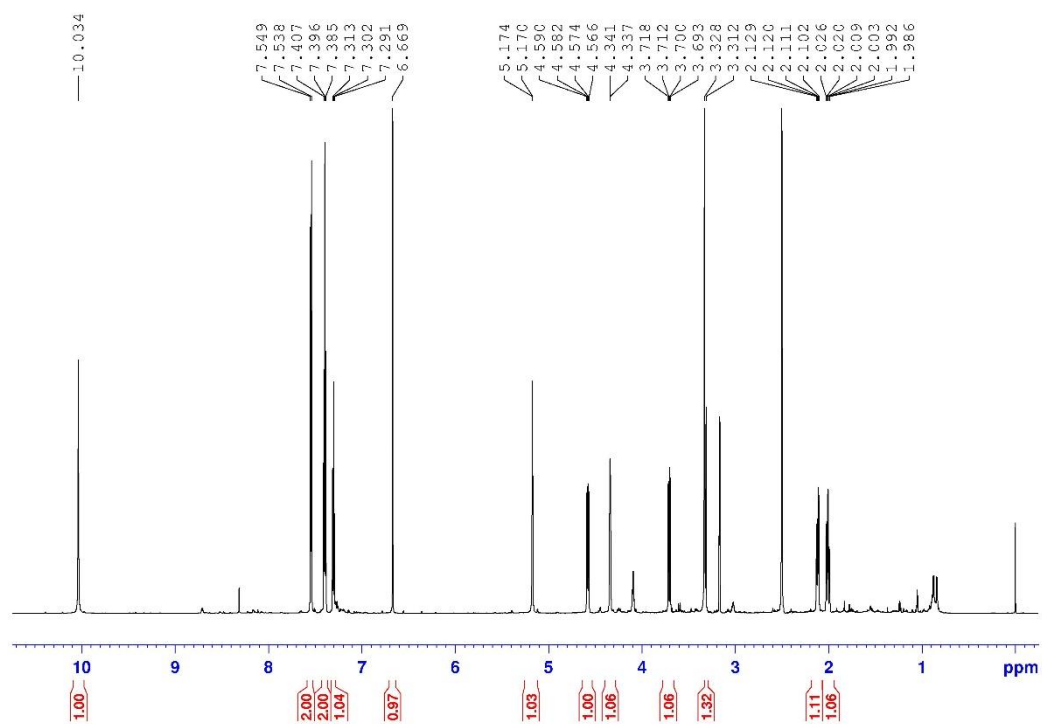

**Figure S6.** <sup>1</sup>H NMR spectrum of **1** recorded in DMSO-*d*<sub>6</sub> (600 MHz)

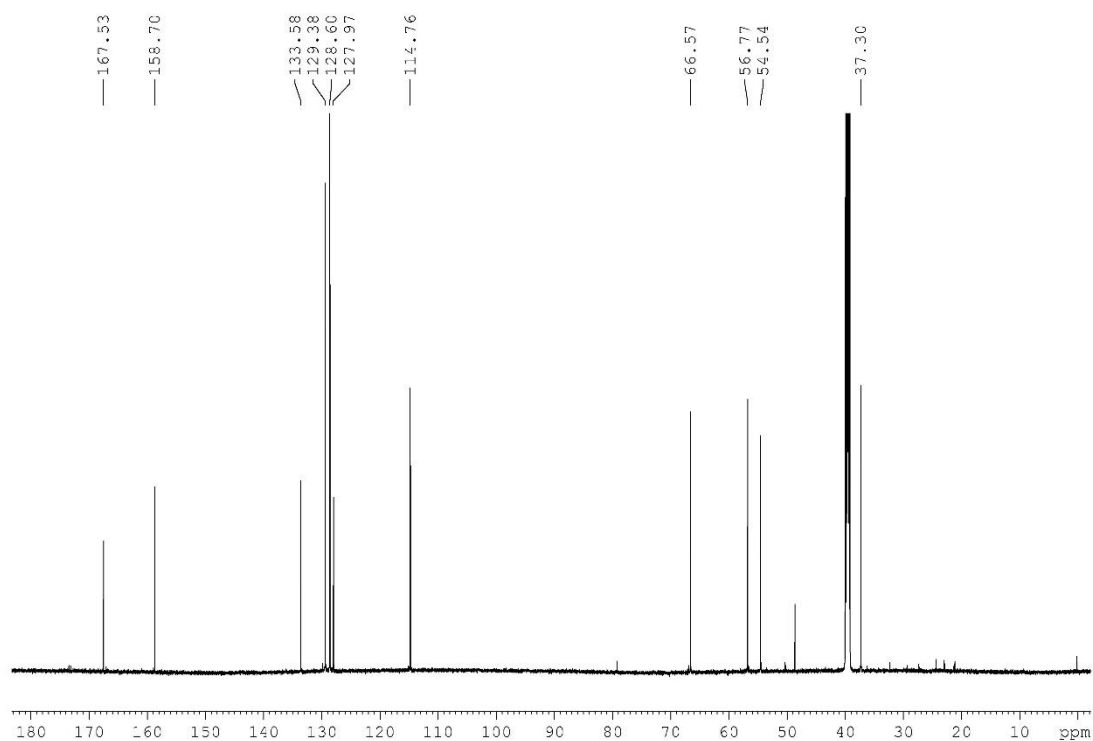

**Figure S7.** <sup>13</sup>C NMR spectrum of **1** recorded in DMSO-*d*<sub>6</sub> (150 MHz)

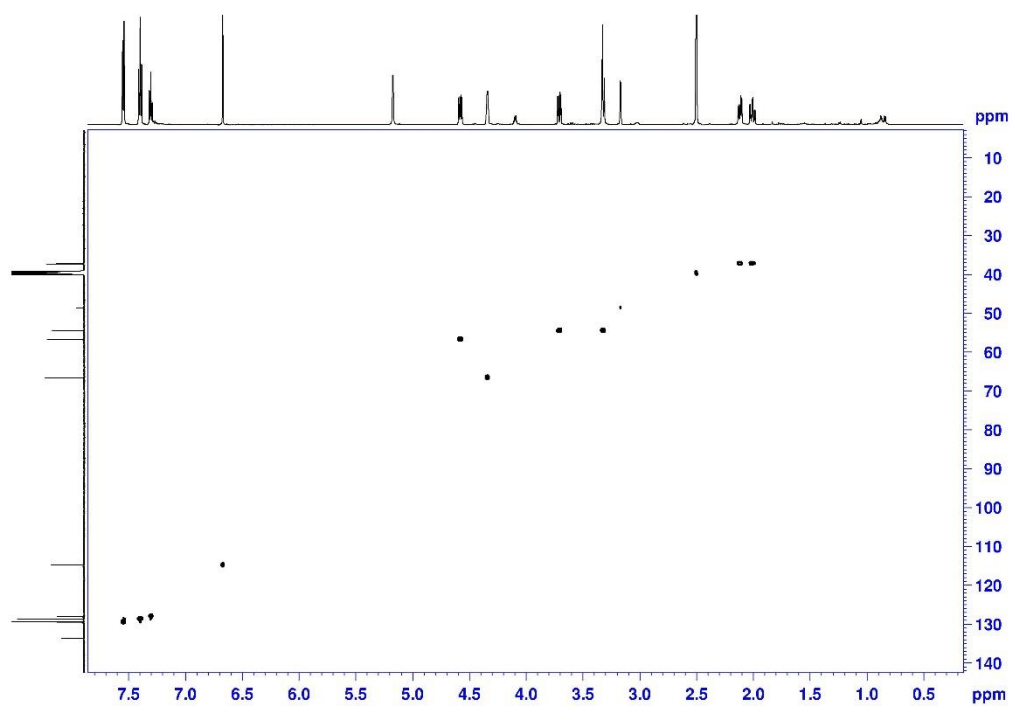

**Figure S8.** HSQC spectrum of **1** recorded in DMSO- $d_6$  (600 MHz)

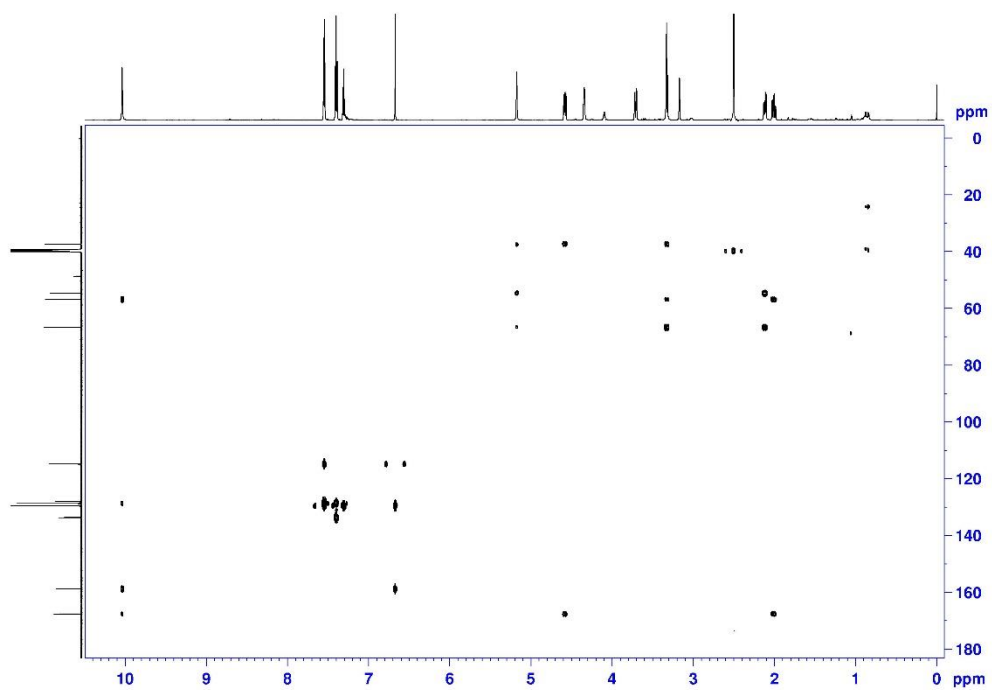

**Figure S9.** HMBC spectrum of **1** recorded in DMSO- $d_6$  (600 MHz)

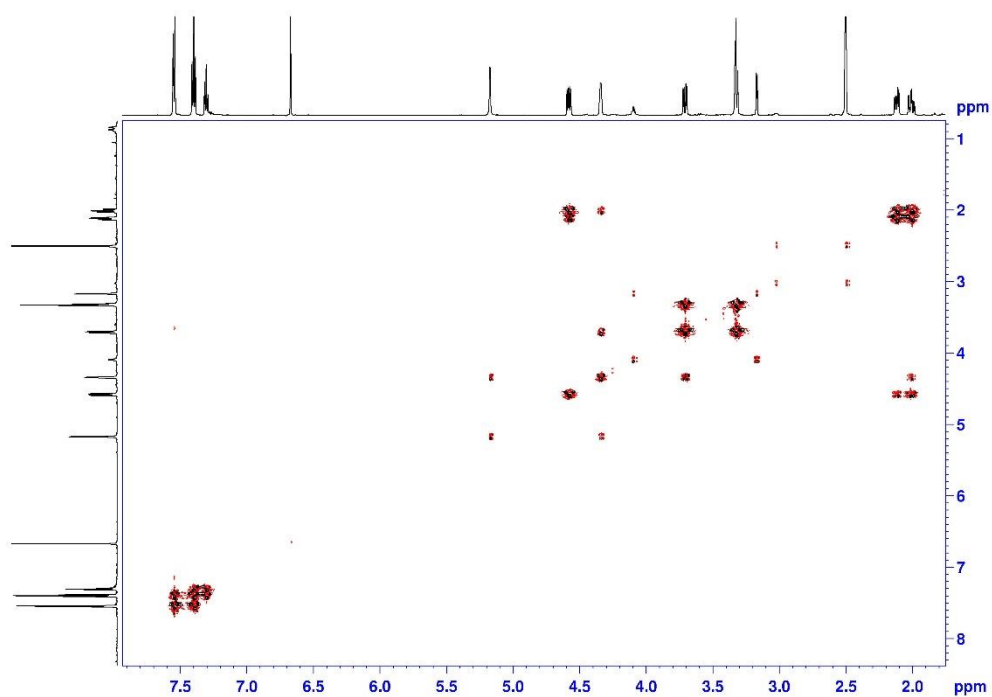

**Figure S10.**  $^1\text{H}$ - $^1\text{H}$  COSY spectrum of **1** recorded in  $\text{DMSO-}d_6$  (600 MHz)

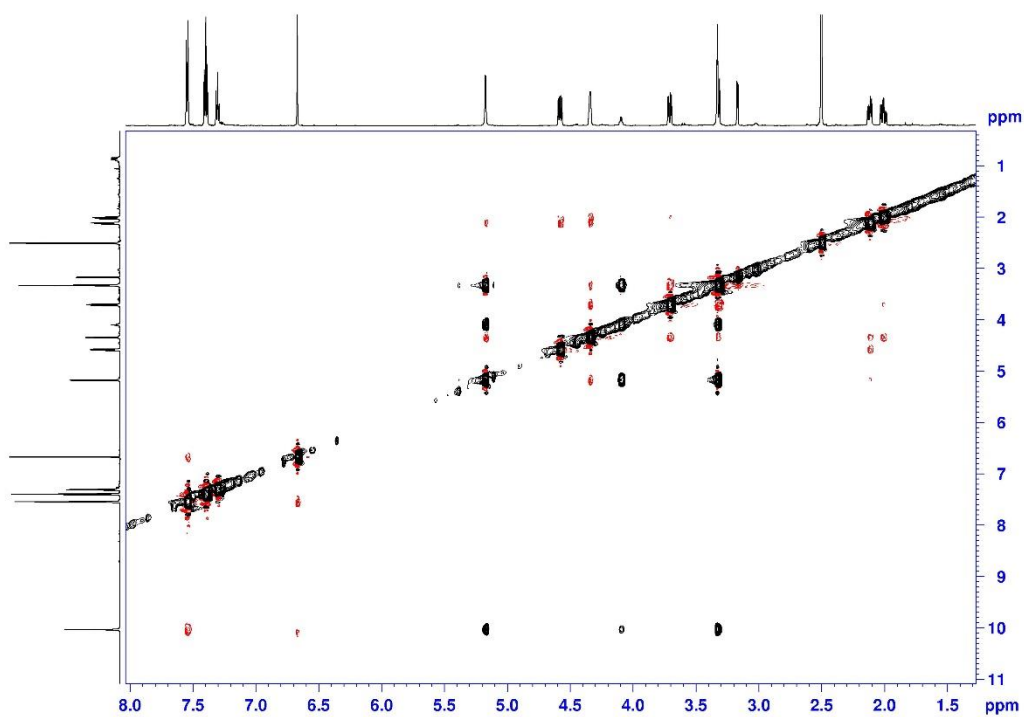

**Figure S11.**  $^1\text{H}$ - $^1\text{H}$  NOESY spectrum of **1** recorded in  $\text{DMSO-}d_6$  (600 MHz)

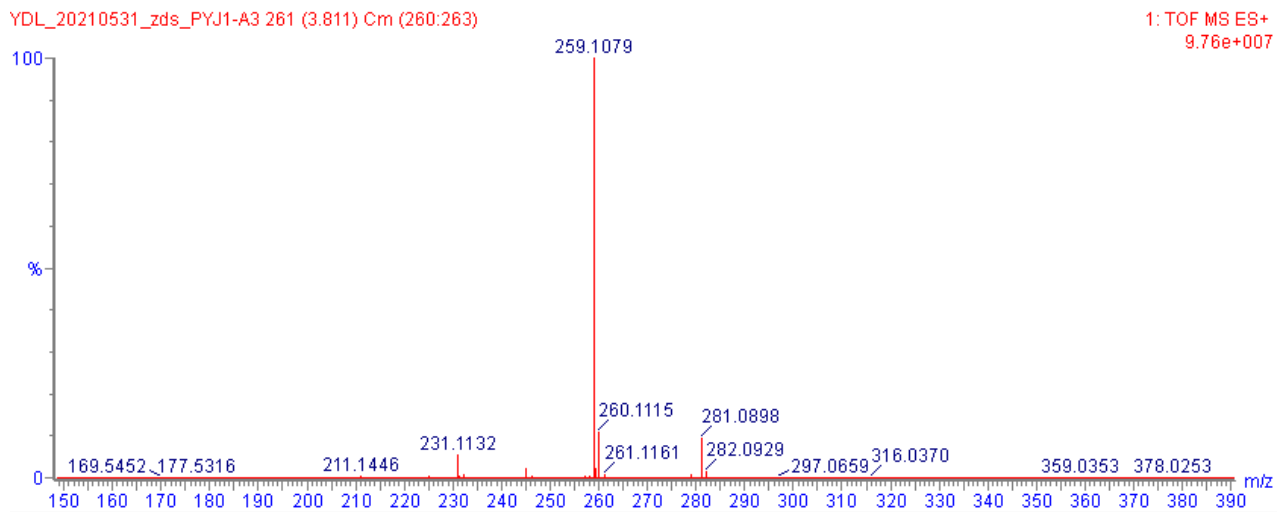

**Figure S12.** HR-ESI-MS spectra of **1**

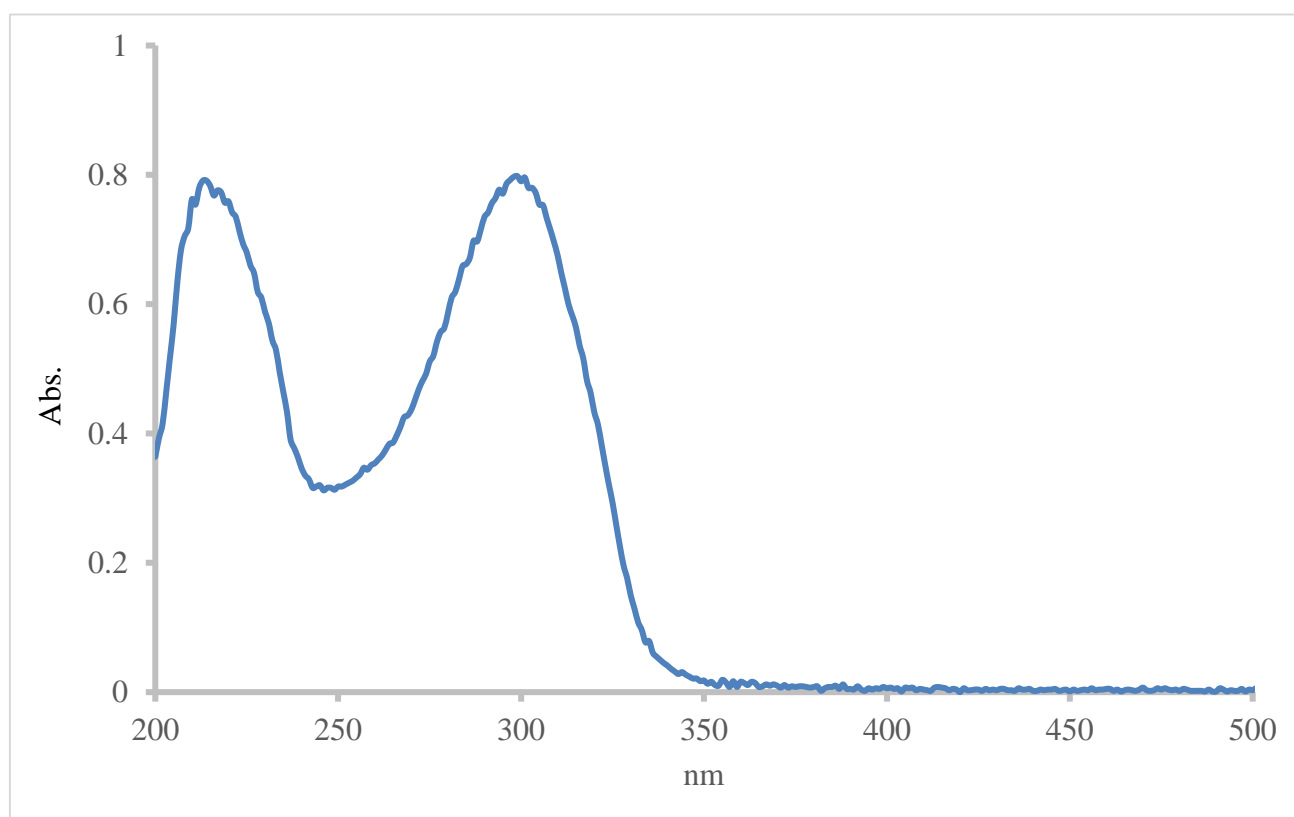

**Figure S13.** UV spectrum of **1**

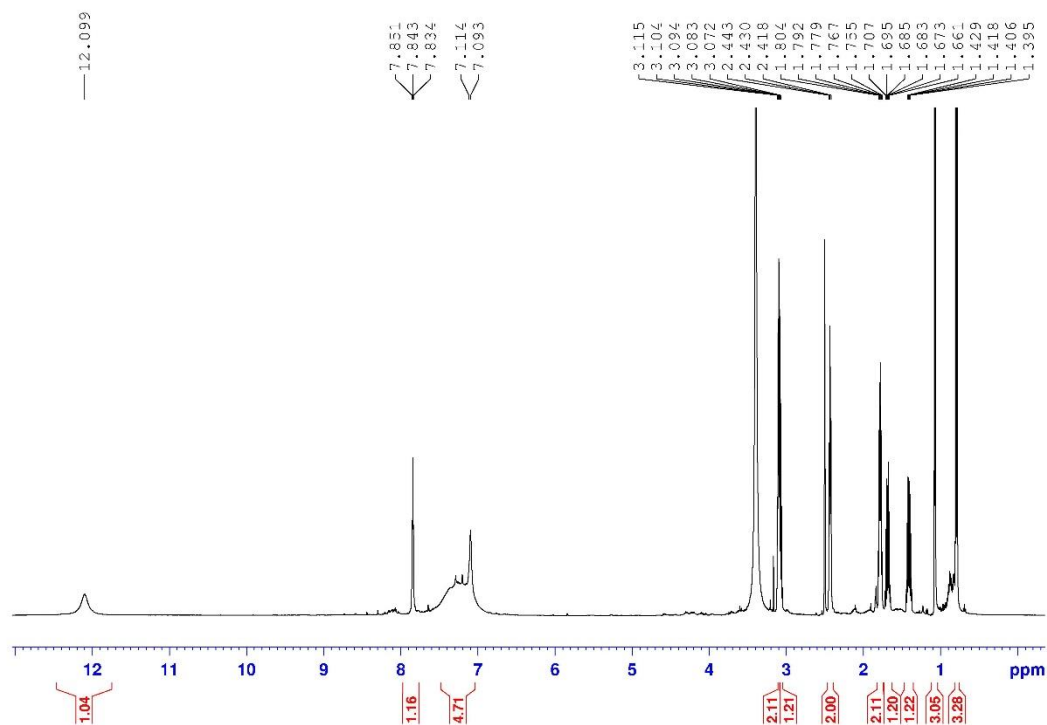

**Figure S14.** <sup>1</sup>H NMR spectrum of **2** recorded in DMSO-*d*<sub>6</sub> (600 MHz)

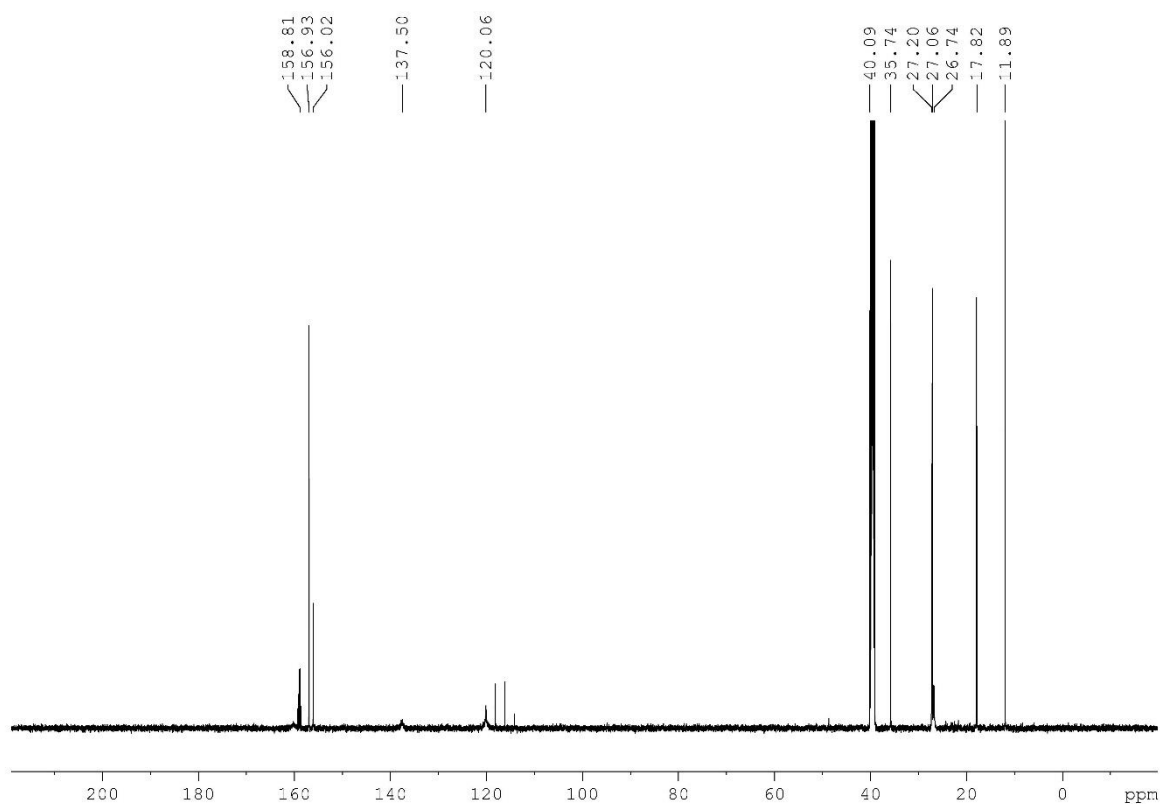

**Figure S15.** <sup>13</sup>C NMR spectrum of **2** recorded in DMSO-*d*<sub>6</sub> (150 MHz)

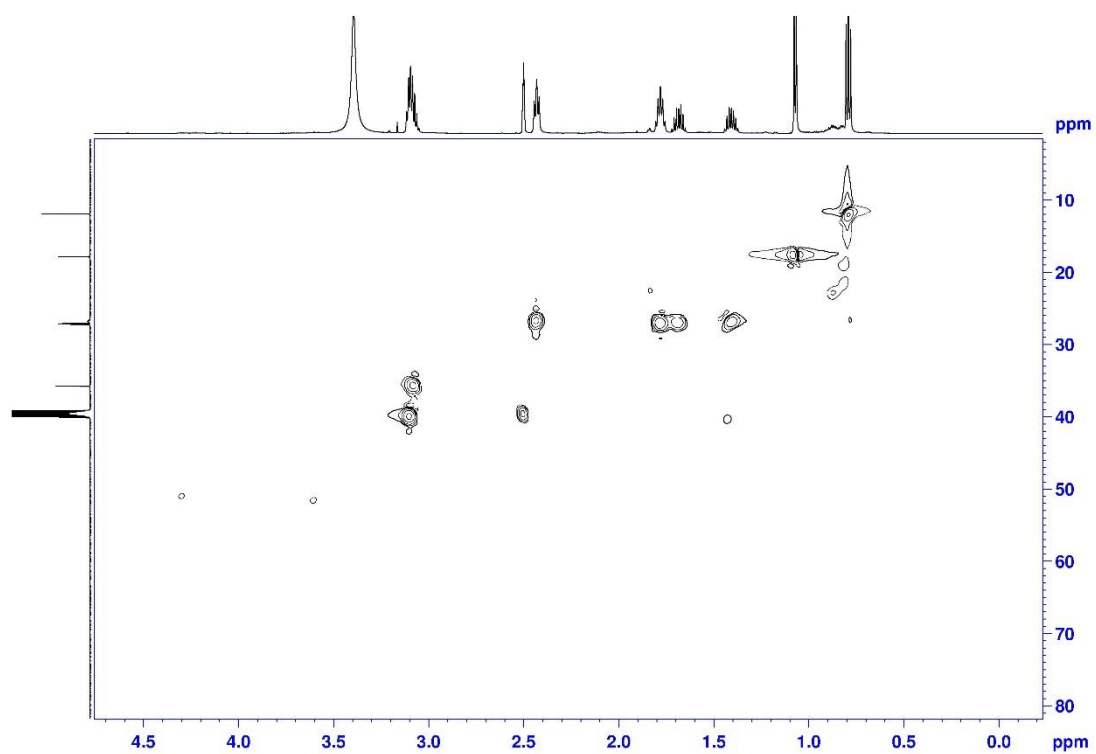

**Figure S16.** HSQC spectrum of **2** recorded in DMSO- $d_6$  (600 MHz)

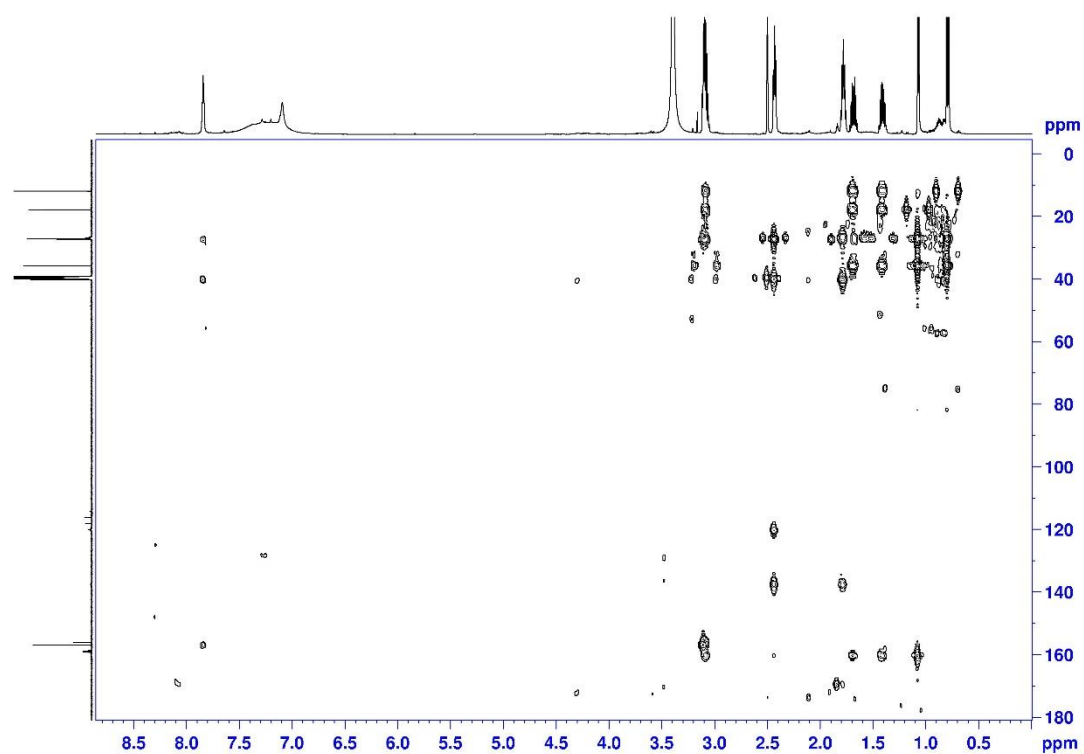

**Figure S17.** HMBC spectrum of **2** recorded in DMSO- $d_6$  (600 MHz)

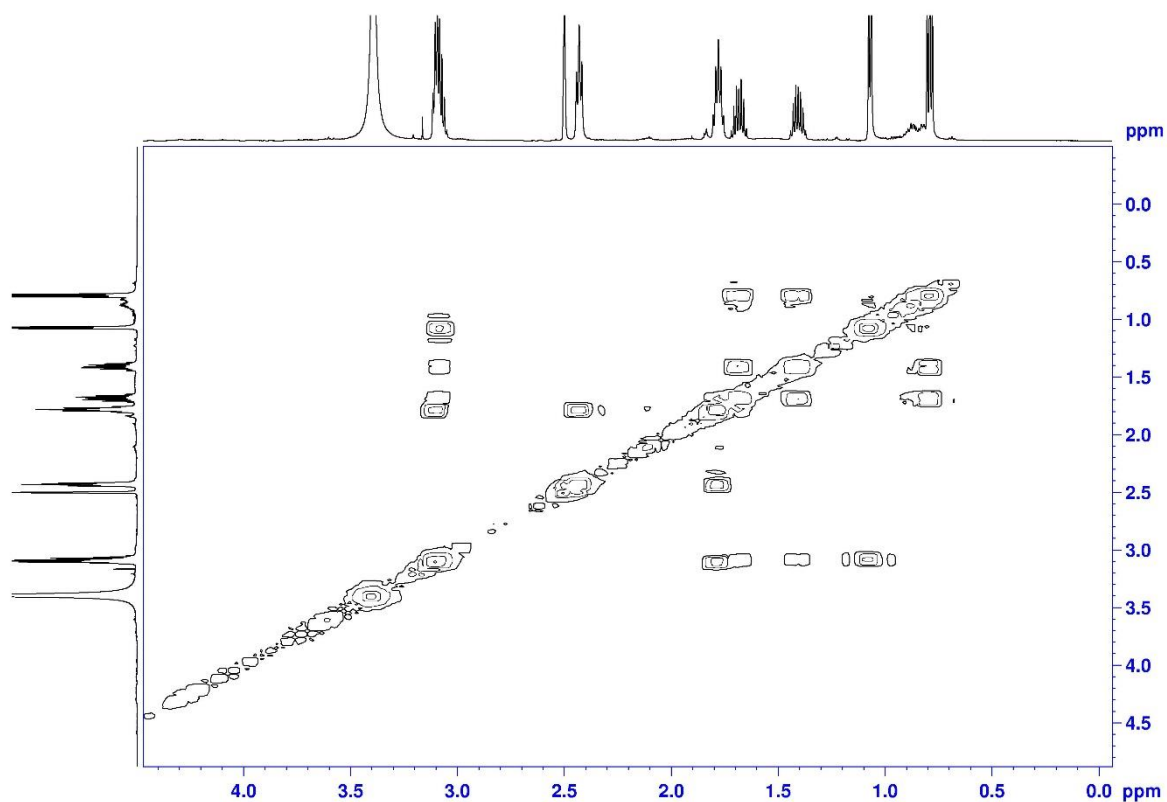

**Figure S18.**  $^1\text{H}$ - $^1\text{H}$  COSY spectrum of **2** recorded in  $\text{DMSO}-d_6$  (600 MHz)

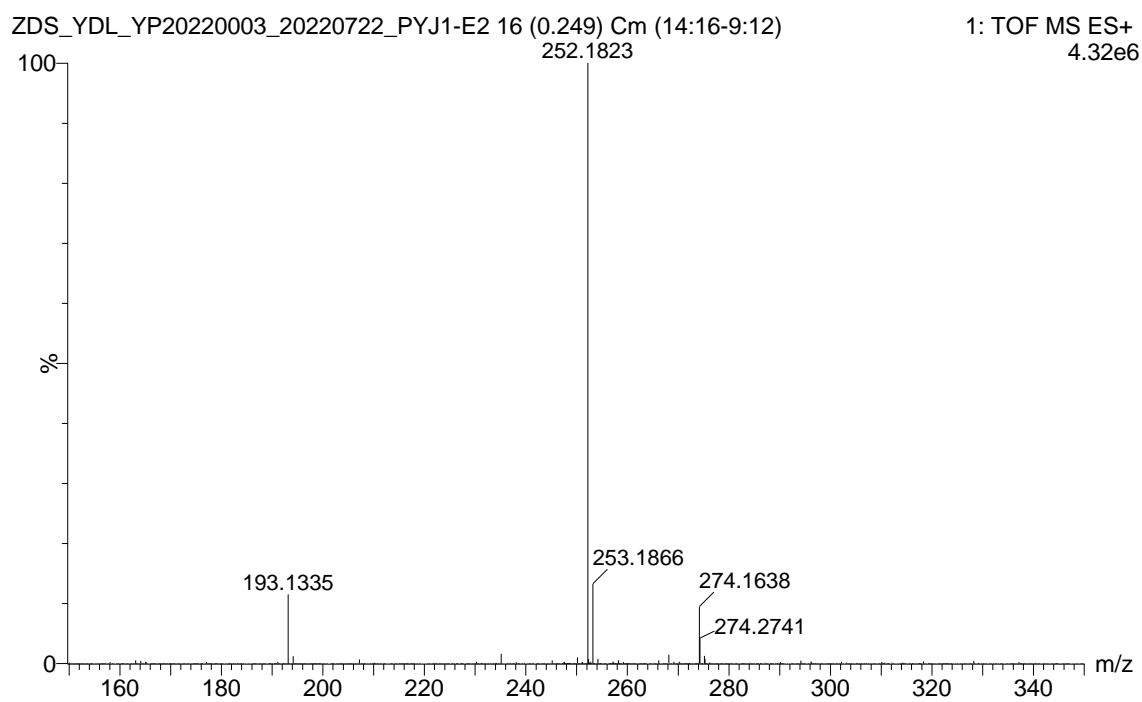

**Figure S19.** HR-ESI-MS spectra of **2**

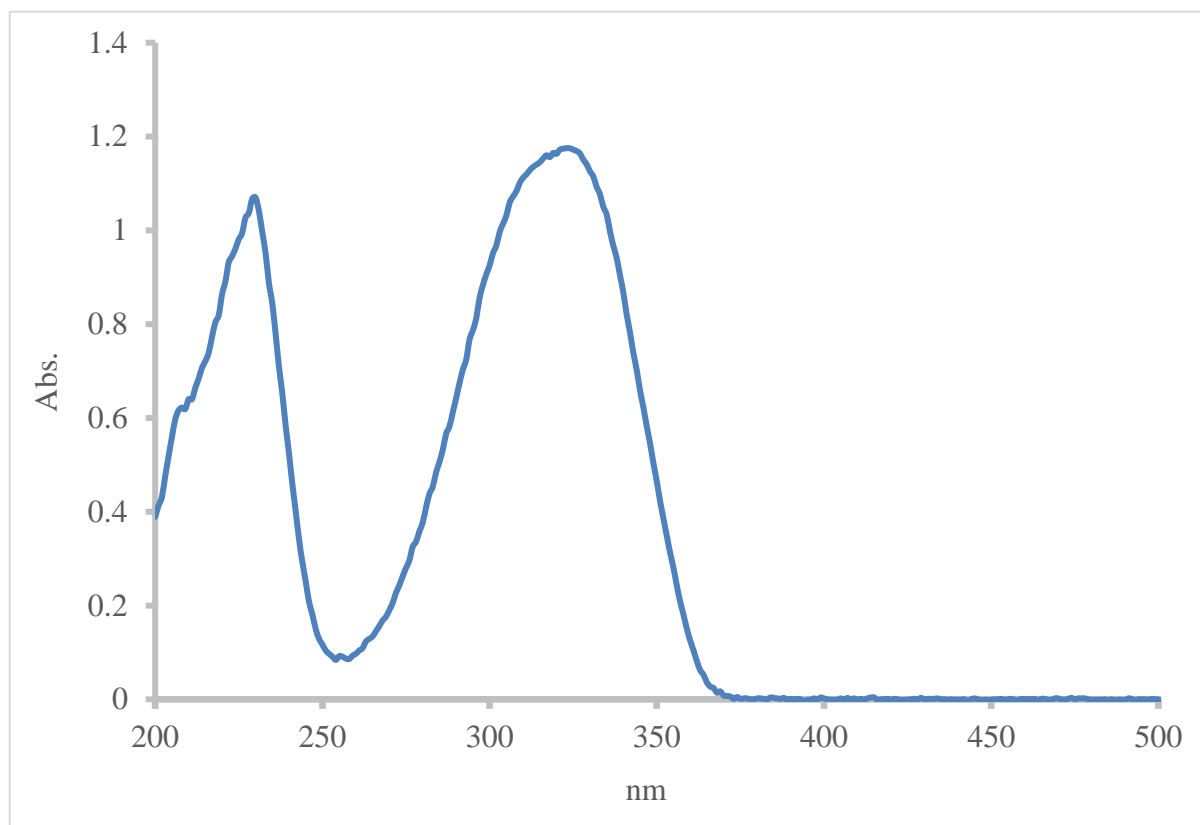

**Figure S20.** UV spectrum of **2**



## References

18. Wang J.; Kong L.; Qiao Y.; Zhang D.; Deng Z.; You D. Genome mining guided discovery and identification of nystatin and toyocamycin in *Streptomyces hygrospinosus* var.beijingensis. *Acta Microbiol. Sin.* **2021**, 3076-3086. - 18 in main
38. Paget M. S.; Chamberlin L.; Atrih A.; Foster S. J.; Buttner M. J. Evidence that the extracytoplasmic function sigma factor sigmaE is required for normal cell wall structure in *Streptomyces coelicolor* A3(2). *J. Bacteriol.* **1999**, 181, 204-211.
39. He Y.; Wang Z.; Bai L.; Liang J.; Zhou X.; Deng Z. Two pHZ1358-derivative vectors for efficient gene knockout in *Streptomyces*. *J. Microbiol. Biotechnol.* **2010**, 20, 678-682.
40. Gust B.; Challis G. L.; Fowler K.; Kieser T.; Chater K. F. PCR-targeted *Streptomyces* gene replacement identifies a protein domain needed for biosynthesis of the sesquiterpene soil odor geosmin. *Proc. Natl. Acad. Sci. U. S. A.* **2003**, 100, 1541-1546.
41. Tan G. Y.; Deng K.; Liu X.; Tao H.; Chang Y.; Chen J.; Chen K.; Sheng Z.; Deng Z.; Liu T. Heterologous biosynthesis of spinosad: an Omics-guided large polyketide synthase gene cluster reconstitution in *Streptomyces*. *ACS Synth. Biol.* **2017**, 6, 995-1005.
42. Sun X.; Wang G.; Xiao H.; Jiang J.; Xiao D.; Xing B.; Li A.; Zhang Y.; Sun K.; Xu Y.; Guo L.; Yang D.; Ma M. Strepimidazoles A-G from the plant endophytic *Streptomyces* sp. PKU-EA00015 with inhibitory activities against a plant pathogenic fungus. *J. Nat. Prod.* **2020**, 83, 2246-2254.
43. Sun C.; Liu Z.; Zhu X.; Fan Z.; Huang X.; Wu Q.; Zheng X.; Qin X.; Zhang T.; Zhang H.; Ju J.; Ma J. Antitubercular ilamycins from marine-derived *Streptomyces atratus* SCSIO ZH16 ΔilaR. *J. Nat. Prod.* **2020**, 83, 1646-1657.
44. Perlatti B.; Lan N.; Earp C. E.; AghaAmiri S.; Vargas S. H.; Azhdarinia A.; Bills G. F.; Gloer J. B. Arenicolins: C-glycosylated depsides from *Penicillium arenicola*. *J. Nat. Prod.* **2020**, 83, 668-674.
45. Huo C.; Zheng Z.; Xu Y.; Ding Y.; Zheng H.; Mu Y.; Niu Y.; Gao J.; Lu X. Naphthacemycins from a *Streptomyces* sp. as protein-tyrosine phosphatase inhibitors. *J. Nat. Prod.* **2020**, 83, 1394-1399.
46. Zhang W.; Wang L.; Kong L.; Wang T.; Chu Y.; Deng Z.; You D. Unveiling the post-PKS

redox tailoring steps in biosynthesis of the type II polyketide antitumor antibiotic xantholipin.

*Chem. Biol.* **2012**, 19, 422-432.

21. Lautru S.; Gondry M.; Genet R.; Pernodet J. L. The albonoursin gene cluster of *S. noursei* biosynthesis of diketopiperazine metabolites independent of nonribosomal peptide synthetases. *Chem. Biol.* **2002**, 9, 1355-1364.
